# Supplementary material for: Strong Increase in Moxifloxacin Resistance Rate among Multidrug-Resistant Mycobacterium tuberculosis Isolates in China, 2007 to 2013
Source: PubMed Central journal article supplement (PMC8635133; doi:10.1128/spectrum.00409-21), 2021-12-01
Supplement: spectrum00409-21_supp_2_seq7.pdf [file spectrum00409-21_supp_2_seq7.pdf]

**Strong increase in moxifloxacin resistance rate among multi-drug resistant *Mycobacterium tuberculosis* isolates in China, 2007-2013**

**Table S1. Univariable and multivariable analysis of risk factors for moxifloxacin resistance at 0.5µg/mL by MGIT in 2007**

| Characteristic                                                  | All cases n | Resistant n (%) | Susceptible n (%) | cPR (95% CI)     | <i>P</i> value | aPR (95% CI)     | <i>P</i> value |
|-----------------------------------------------------------------|-------------|-----------------|-------------------|------------------|----------------|------------------|----------------|
| Gender                                                          |             |                 |                   |                  |                |                  |                |
| Male                                                            | 206         | 25 (12.1)       | 181 (87.9)        | 1                |                |                  |                |
| Female                                                          | 113         | 16 (14.2)       | 97 (85.8)         | 1.10(0.77-1.58)  | 0.61           | -                |                |
| Age (years)                                                     |             |                 |                   |                  |                |                  |                |
| <40                                                             | 150         | 14 (9.3)        | 136 (90.7)        | 1                |                |                  |                |
| 40-59                                                           | 106         | 16 (15.1)       | 90 (84.9)         | 1.33(0.89-2.0)   | 0.16           | -                |                |
| ≥ 60                                                            | 63          | 11 (17.5)       | 52 (82.5)         | 1.47 (0.93-2.32) | 0.10           | -                |                |
| Residential area within China                                   |             |                 |                   |                  |                |                  |                |
| East                                                            | 103         | 12 (11.7)       | 91 (88.3)         | 1                |                |                  |                |
| Central                                                         | 159         | 20 (12.6)       | 139 (87.4)        | 1.05 (0.70-1.57) | 0.82           | -                |                |
| West                                                            | 57          | 9 (15.8)        | 48 (84.2)         | 1.21 (0.73-2.0)  | 0.46           | -                |                |
| Occupation                                                      |             |                 |                   |                  |                |                  |                |
| Farmer                                                          | 200         | 31 (15.5)       | 169 (84.5)        | 1                |                | 1                |                |
| other                                                           | 119         | 10 (8.4)        | 109 (91.6)        | 0.70 (0.47-1.02) | 0.07           | 0.68 (0.46-1.00) | 0.05           |
| Number of previous anti-tuberculosis treatments                 |             |                 |                   |                  |                |                  |                |
| 0                                                               | 130         | 16 (12.3)       | 114 (87.7)        | 1                |                |                  |                |
| 1                                                               | 105         | 11 (10.5)       | 94 (89.5)         | 0.91 (0.59-1.39) | 0.66           | -                |                |
| > 1                                                             | 80          | 13 (16.2)       | 67 (83.8)         | 1.19 (0.78-1.83) | 0.42           | -                |                |
| unknown                                                         | 4           | 1 (25.0)        | 3 (75.0)          | 1.63 (0.42-6.35) | 0.49           | -                |                |
| Previous fluoroquinolones usage for anti-tuberculosis treatment |             |                 |                   |                  |                |                  |                |
| No                                                              | 300         | 36 (12.0)       | 264 (88.0)        | 1                |                | 1                |                |
| Yes                                                             | 19          | 5 (26.3)        | 14 (73.7)         | 1.72 (0.91-3.24) | 0.09           | 1.81 (0.95-3.45) | 0.07           |

cPR: crude Prevalence Ratio; aPR: adjust Prevalence Ratio
